# Supplementary material for: Development of a new oral poliovirus vaccine for the eradication end game using codon deoptimization
Source: PubMed Central journal article supplement (PMC7083942; doi:10.1038/s41541-020-0176-7), 2020-03-20
Supplement: 41541_2020_176_MOESM1_ESM.pdf [file 41541_2020_176_MOESM1_ESM.pdf]

# Please wait...

If this message is not eventually replaced by the proper contents of the document, your PDF viewer may not be able to display this type of document.

You can upgrade to the latest version of Adobe Reader for Windows®, Mac, or Linux® by visiting [http://www.adobe.com/go/reader\\_download](http://www.adobe.com/go/reader_download).

For more assistance with Adobe Reader visit <http://www.adobe.com/go/acrreader>.

Windows is either a registered trademark or a trademark of Microsoft Corporation in the United States and/or other countries. Mac is a trademark of Apple Inc., registered in the United States and other countries. Linux is the registered trademark of Linus Torvalds in the U.S. and other countries.
